# Supplementary material for: Recurrent and founder mutations in the Netherlands: the cardiac phenotype of DES founder mutations p.S13F and p.N342D
Source: Springer Nature journal article supplement (doi:10.1007/s12471-011-0233-y), 2012-01-03
Supplement: MOESM1 [file 618060]

SUPPLEMENTAL DATA, Manuscript: NHJ1136

| **Marker** | **A-VI-2** | **B-VI-10** | **C-VII-8** | **D-II-5** | **E-I-2** | **F-III-1** | **H-III-1** | **Pica II-3** |
| --- | --- | --- | --- | --- | --- | --- | --- | --- |
| D2S1384 | 151/155 | 141/151 | 146/151 | 137/146 | 146/155 | 146/151 | 141/151 | 137/137 |
| D2S137 | 152/156 | 144/152 | 150/154 | 154/158 | 152/154 | 150/154 | 144/146 | 156/162 |
| D2S164 | 287/287 | 287/287 | 271/277 | 287/277 | 277/285 | 287/287 | 277/277 | 277/285 |
| D2S104 | 115/115 | 115/111 | 115/111 | 115/111 | 115/117 | 115/111 | 115/111 | 111/131 |
| D2S2244 | 242/238 | 242/240 | 242/240 | 242/238 | 242/236 | 242/238 | 242/238 | 238/238 |
| *DES* | c.38C>T | c.38C>T | c.38C>T | c.38C>T | c.38C>T | c.38C>T | c.38C>T | c.38C>T |
| D2S2359 | 270/266 | 270/268 | 270/266 | 270/266 | 270/266 | 270/266 | 270/268 | 266/270 |
| D2S1242 | 159/149 | 159/163 | 159/153 | 159/167 | 159/159 | 159/167 | 159/167 | 149/165 |
| D2S2372 | 154/152 | 154/152 | 154/154 | 154/152 | 154/152 | 154/152 | 154/152 | 154/158 |
| D2S2300 | 251/251 | 251/251 | 251/253 | 251/251 | 251/251 | 251/249 | 251/251 | 241/241 |
| D2S2354 | 256/268 | 254/254 | 254/252 | 254/254 | 254/254 | 254/270 | 254/254 | 256/258 |

**Supplemental data: Table 1** Haplotype analysis of p.S13F (c.38C>T) mutation carriers from seven Dutch families and one Singapore-Chinese family12

Haplotypes shared by mutation carriers are shown in gray shaded areas. Affected persons show a common haplotype spanning a region of at least 8.4 cM and at most 13.7 cM around the *DES* gene.

| **Marker** |  | **O-IV-2** | **U-IV-5** | **A-II-1** |
| --- | --- | --- | --- | --- |
| D2S1384 |  | 151/155 | 150/150 | 151/155 |
| D2S137 |  | 150/154 | 154/154 | 105/154 |
| D2S164 |  | 275/286 | 275/286 | 267/268 |
| D2S104 |  | 111/117 | 111/117 | 111/117 |
| D2S2244 |  | 242/234 | 240/234 | 238/234 |
| *DES* |  | c.1024A>G | c.1024A>G | c.1024A>G |
| D2S2359 |  | 267/271 | 246/271 | 269/271 |
| D2S1242 |  | 154/168 | 163/168 | 154/168 |
| D2S2372 |  | 155/159 | 154/159 | 155/159 |
| D2S2300 |  | 219/251 | 251/251 | 251/251 |
| D2S2354 |  | 256/256 | 254/256 | 254/258 |

**Supplemental data: Table 2** Haplotype analysis of p.N342D (c.1024A>G) mutation carriers from three Dutch families

Haplotypes shared by mutation carriers are shown in gray shaded areas. Affected persons show a common haplotype spanning a region of at least 11.8 cM and at most 27.9 cM around the *DES* gene.
